# Supplementary material
Source: PubMed Central journal article supplement (PMC7964752)
Supplement: 3142_figures.pdf [file 3142_figures.pdf]

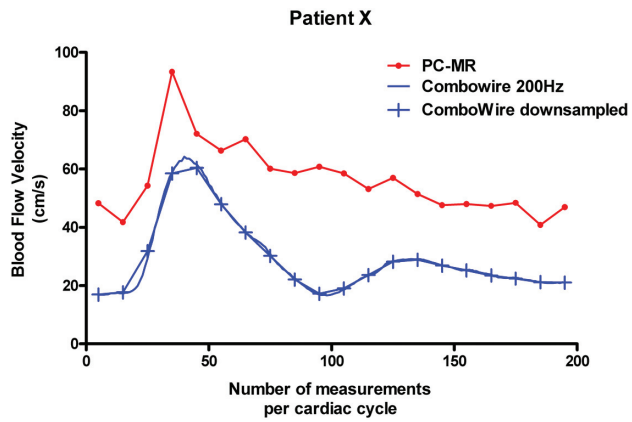

**On-line Fig 1.** Velocity data acquired by the ComboWire down-sampled to match the number of measurements obtained with PC-MR imaging compressed.

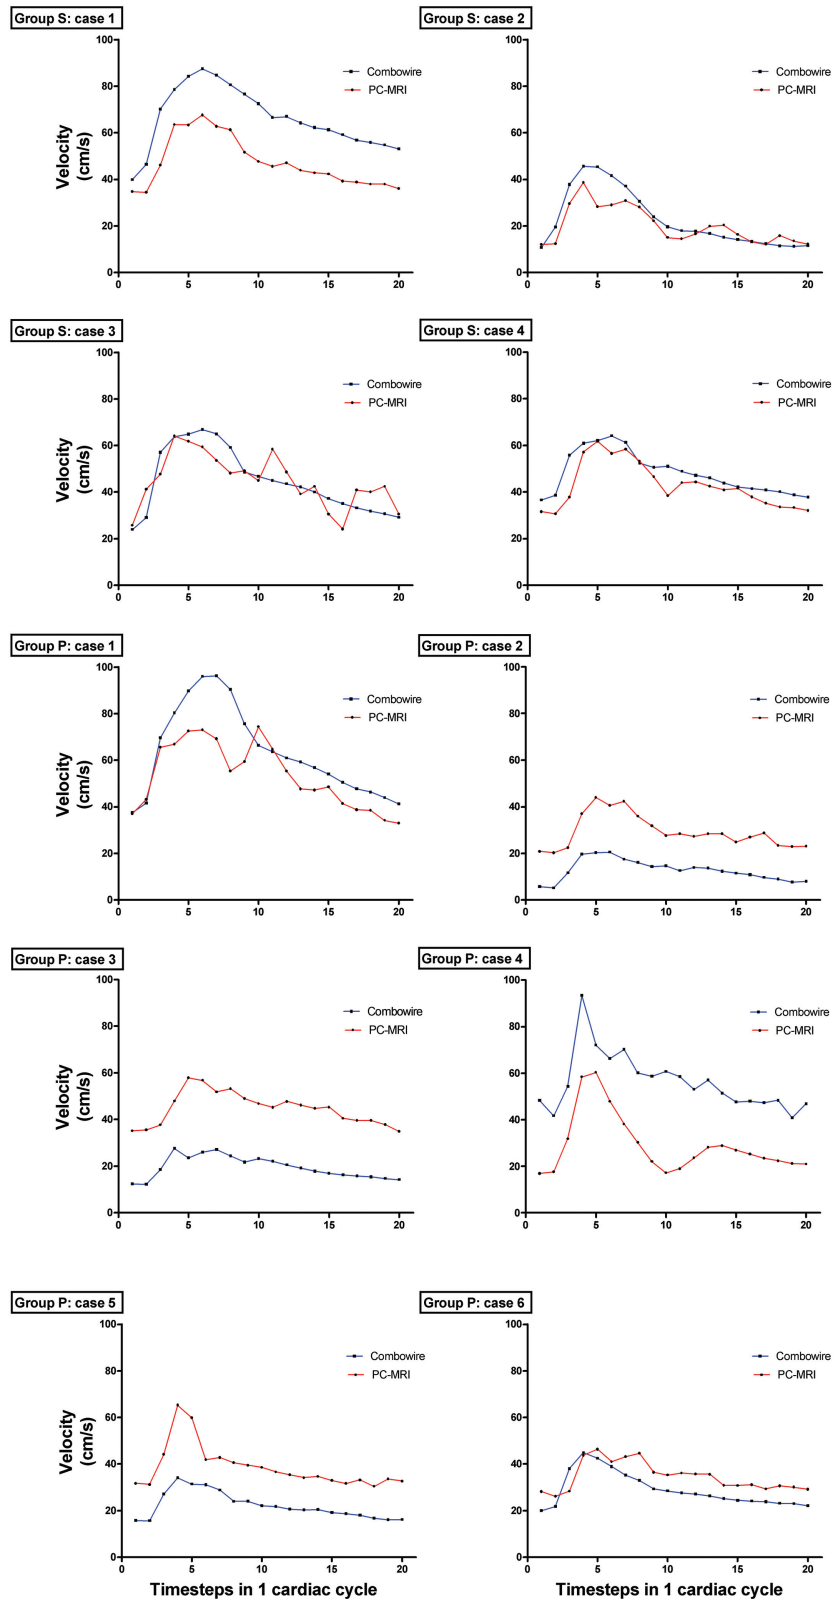

**On-line Fig 2.** Interpatient variation in cerebral blood flow velocity, measured with the Combowire and PC-MR imaging.

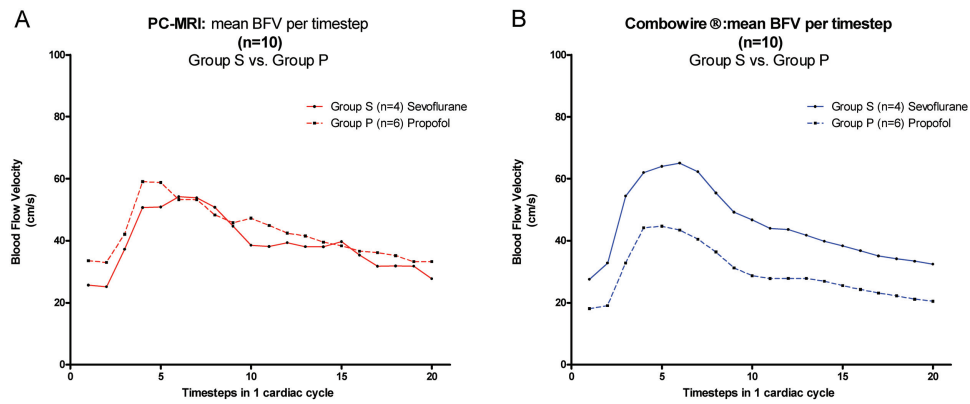

**On-line Fig 3.** Differences between groups S and P. *A*, PC-MR imaging measurements in all patients, under nonanesthetized conditions. *B*, ComboWire measurements, comparing both groups.

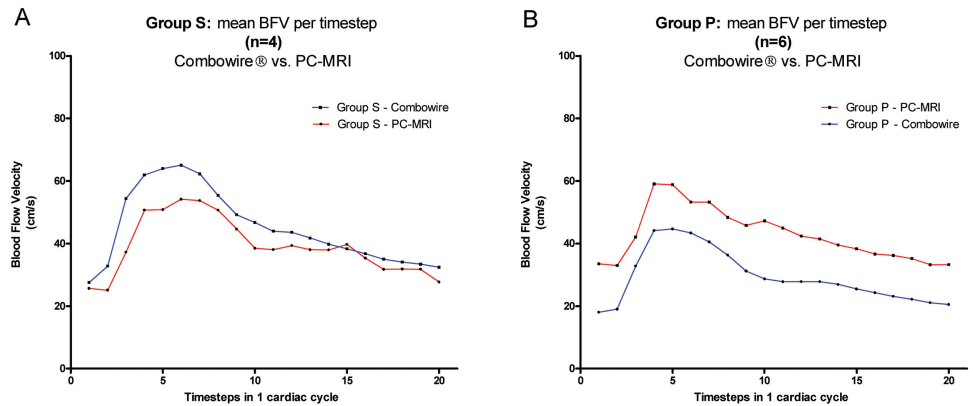

**On-line Fig 4.** Differences between modalities with patients under different types of anesthetics. Group S: Mean BFV measurements with the ComboWire under sevoflurane anesthetic compared with PC-MR imaging. Group P: Mean BFV measurements with ComboWire under propofol anesthetic.
